# Supplementary material for: Over-expression of a NAC 67 transcription factor from finger millet (Eleusine coracana L.) confers tolerance against salinity and drought stress in rice
Source: PubMed Central journal article supplement (PMC4896240; doi:10.1186/s12896-016-0261-1), 2016-05-11
Supplement: 12896_2016_261_MOESM1_ESM.pdf [file 12896_2016_261_MOESM1_ESM.pdf]

**Additional file 1:- List of primers used in the study**

| <b>Primer Name</b>                                                                        | <b>Sequence (5'-3')</b>                  |
|-------------------------------------------------------------------------------------------|------------------------------------------|
| <b>Primer for isolating full length gene EcNAC67 and PCR analysis of transgenic lines</b> |                                          |
| NAC -F                                                                                    | <i>cgcg gatcc</i> CAGGAGGGAGAGAGGAAAGAG  |
| NAC -R                                                                                    | <i>cgcggtacc</i> CGGATCAGGTTTCAGGTTCTTCG |
| Hyg -F                                                                                    | TACACAGCCATCGGTCCAG                      |
| CaMV35S-R                                                                                 | ACCTCCTCGGATTCCATTGC                     |
| Vir-F                                                                                     | ATCGACGCCTCCAAAGTGAC                     |
| Vir-R                                                                                     | AAACGCGAGGAGAAGATTGA                     |
| <b><i>Primer used for qRT PCR</i></b>                                                     |                                          |
| NAC RT-F                                                                                  | TCAGCAGCAGATGATGGTG                      |
| NAC RT-R                                                                                  | CGGATCAGGTTTCAGGTTCTTCG                  |
| Ubiquitin -F                                                                              | AGAAGCGCAAGAAGAAGACG                     |
| Ubiquitin -R                                                                              | GCGTCGTCCACCTTG TAGA                     |
| Actin -F                                                                                  | GGCATCACACCTTCTACAAC                     |
| Actin -R                                                                                  | TCATCTTCTCACGGTTAGC                      |
| <b><i>Primer used for isolating probe for Southern blot analysis</i></b>                  |                                          |
| Hpt S-F                                                                                   | GCTGTTATGCGGCCATTGTC                     |
| Hpt S-R                                                                                   | GACGTCTGTGCGAGAAGTTTG                    |
