# Supplementary material for: Over-expression of a NAC 67 transcription factor from finger millet (Eleusine coracana L.) confers tolerance against salinity and drought stress in rice
Source: PubMed Central journal article supplement (PMC4896240; doi:10.1186/s12896-016-0261-1), 2016-05-11
Supplement: 12896_2016_261_MOESM2_ESM.pdf [file 12896_2016_261_MOESM2_ESM.pdf]

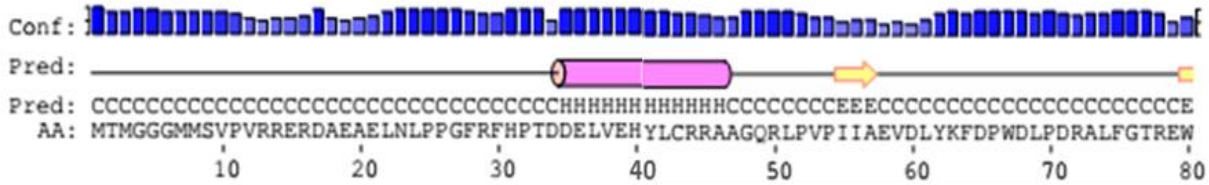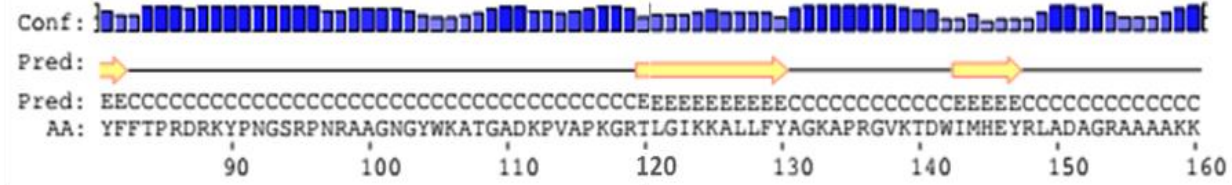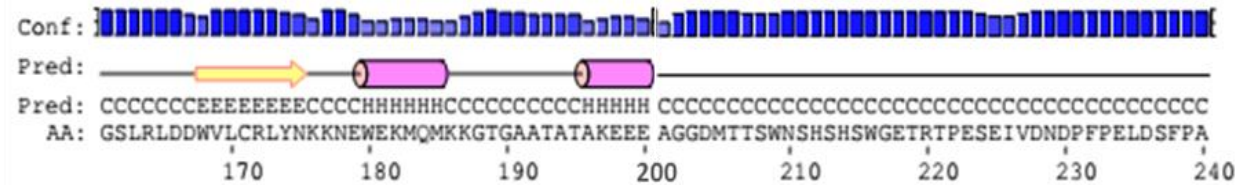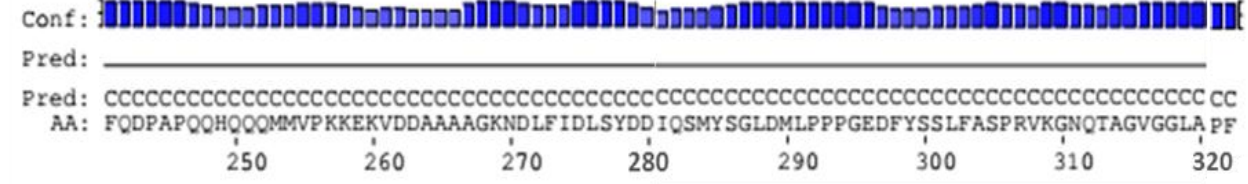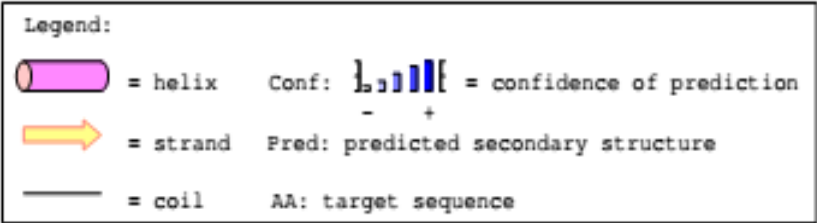

**Additional file 2.** Secondary structure of deduced EcNAC67 protein sequence predicted by PSIPRED protein structure prediction server
