# Supplementary material for: Over-expression of a NAC 67 transcription factor from finger millet (Eleusine coracana L.) confers tolerance against salinity and drought stress in rice
Source: PubMed Central journal article supplement (PMC4896240; doi:10.1186/s12896-016-0261-1), 2016-05-11
Supplement: 12896_2016_261_MOESM3_ESM.pdf [file 12896_2016_261_MOESM3_ESM.pdf]

**Additional file 3. Estimates of Evolutionary Divergence between among NAC homologs.** Analyses were conducted using the Poisson correction model. All positions containing gaps and missing data were eliminated. There were a total of 241 positions in the final dataset. Evolutionary analyses were conducted in MEGA6 .

|                                | <i>Ec</i> NAC67<br><i>Trichy1</i> | <i>E. coracana</i><br>NAC1 | <i>S. italica</i><br>NAC67 | <i>S. bicolor</i><br>SNAC1 | <i>O. rufipogon</i><br>SNAC1 | <i>O. sativa</i><br>SNAC1 | <i>Z. mays</i><br>NAC67 | <i>O. sativa</i><br>NAC67 | <i>O. nivara</i><br>SNAC1 | <i>B. distachyon</i><br>NAC67 | <i>O. sativa</i><br>NAC20 | <i>O. brachyantha</i><br>NAC67 |
|--------------------------------|-----------------------------------|----------------------------|----------------------------|----------------------------|------------------------------|---------------------------|-------------------------|---------------------------|---------------------------|-------------------------------|---------------------------|--------------------------------|
| <i>E. coracana</i><br>NAC1     | 0.297                             |                            |                            |                            |                              |                           |                         |                           |                           |                               |                           |                                |
| <i>S. italica</i><br>NAC67     | 0.096                             | 0.303                      |                            |                            |                              |                           |                         |                           |                           |                               |                           |                                |
| <i>S. bicolor</i><br>SNAC1     | 0.091                             | 0.326                      | 0.047                      |                            |                              |                           |                         |                           |                           |                               |                           |                                |
| <i>O. rufipogon</i><br>SNAC1   | 0.124                             | 0.314                      | 0.100                      | 0.082                      |                              |                           |                         |                           |                           |                               |                           |                                |
| <i>O. sativa</i><br>SNAC1      | 0.119                             | 0.314                      | 0.096                      | 0.078                      | 0.008                        |                           |                         |                           |                           |                               |                           |                                |
| <i>Z. mays</i><br>NAC67        | 0.114                             | 0.320                      | 0.064                      | 0.042                      | 0.100                        | 0.096                     |                         |                           |                           |                               |                           |                                |
| <i>O. sativa</i><br>NAC67      | 0.119                             | 0.314                      | 0.096                      | 0.078                      | 0.008                        | 0.000                     | 0.096                   |                           |                           |                               |                           |                                |
| <i>O. nivara</i><br>SNAC1      | 0.119                             | 0.314                      | 0.096                      | 0.078                      | 0.008                        | 0.000                     | 0.096                   | 0.000                     |                           |                               |                           |                                |
| <i>B. distachyon</i><br>NAC67  | 0.177                             | 0.320                      | 0.207                      | 0.197                      | 0.202                        | 0.197                     | 0.222                   | 0.197                     | 0.197                     |                               |                           |                                |
| <i>O. sativa</i><br>NAC20      | 0.162                             | 0.373                      | 0.142                      | 0.128                      | 0.064                        | 0.055                     | 0.147                   | 0.055                     | 0.055                     | 0.243                         |                           |                                |
| <i>O. brachyantha</i><br>NAC67 | 0.119                             | 0.320                      | 0.091                      | 0.078                      | 0.021                        | 0.013                     | 0.091                   | 0.013                     | 0.013                     | 0.202                         | 0.064                     |                                |
| <i>T. aestivum</i><br>NAC2     | 0.181                             | 0.320                      | 0.197                      | 0.177                      | 0.177                        | 0.172                     | 0.186                   | 0.172                     | 0.172                     | 0.119                         | 0.233                     | 0.177                          |
